# Supplementary material for: Mesoporous trimetallic PtPdAu alloy films toward enhanced electrocatalytic activity in methanol oxidation: unexpected chemical compositions discovered by Bayesian optimization
Source: Royal Society of Chemistry journal article supplement (doi:10.1039/d0ta04096g), 2020-01-01
Supplement: d0ta04096g1.pdf [file d0ta04096g1.pdf]

## Electronic supplementary information (ESI)

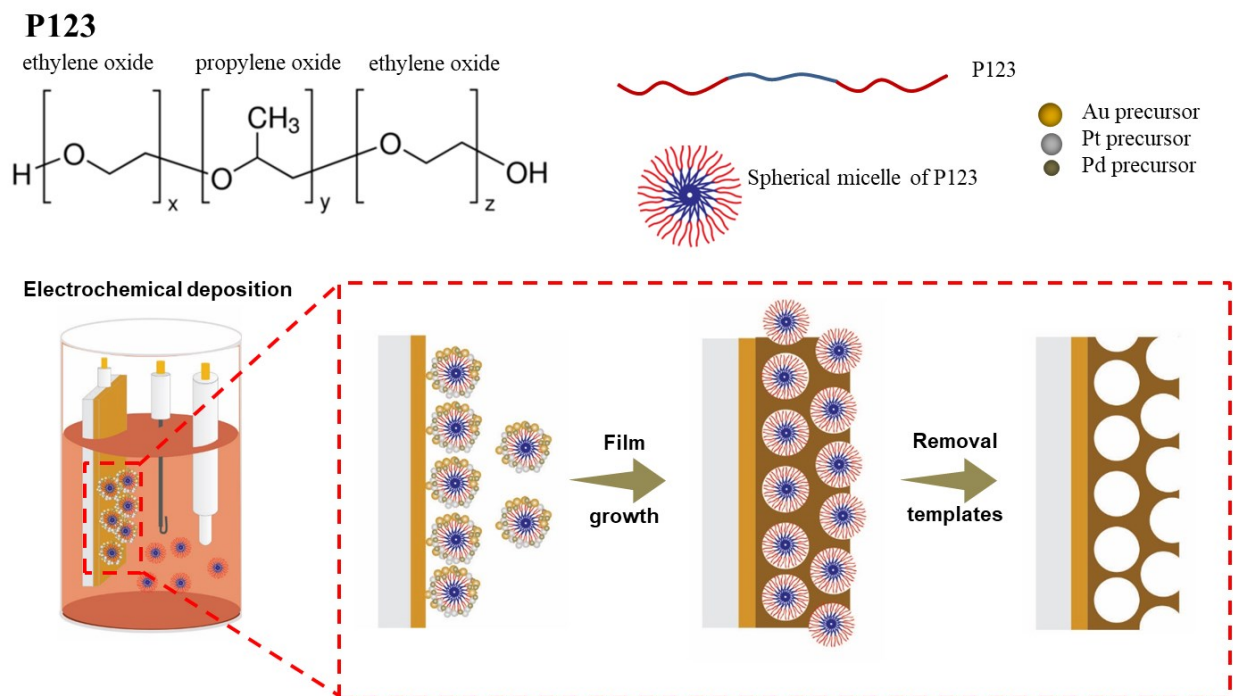

**Figure S1.** Schematic of fabrication of mesoporous PtPdAu alloy film by electrochemical deposition with the micelle assembly approach.

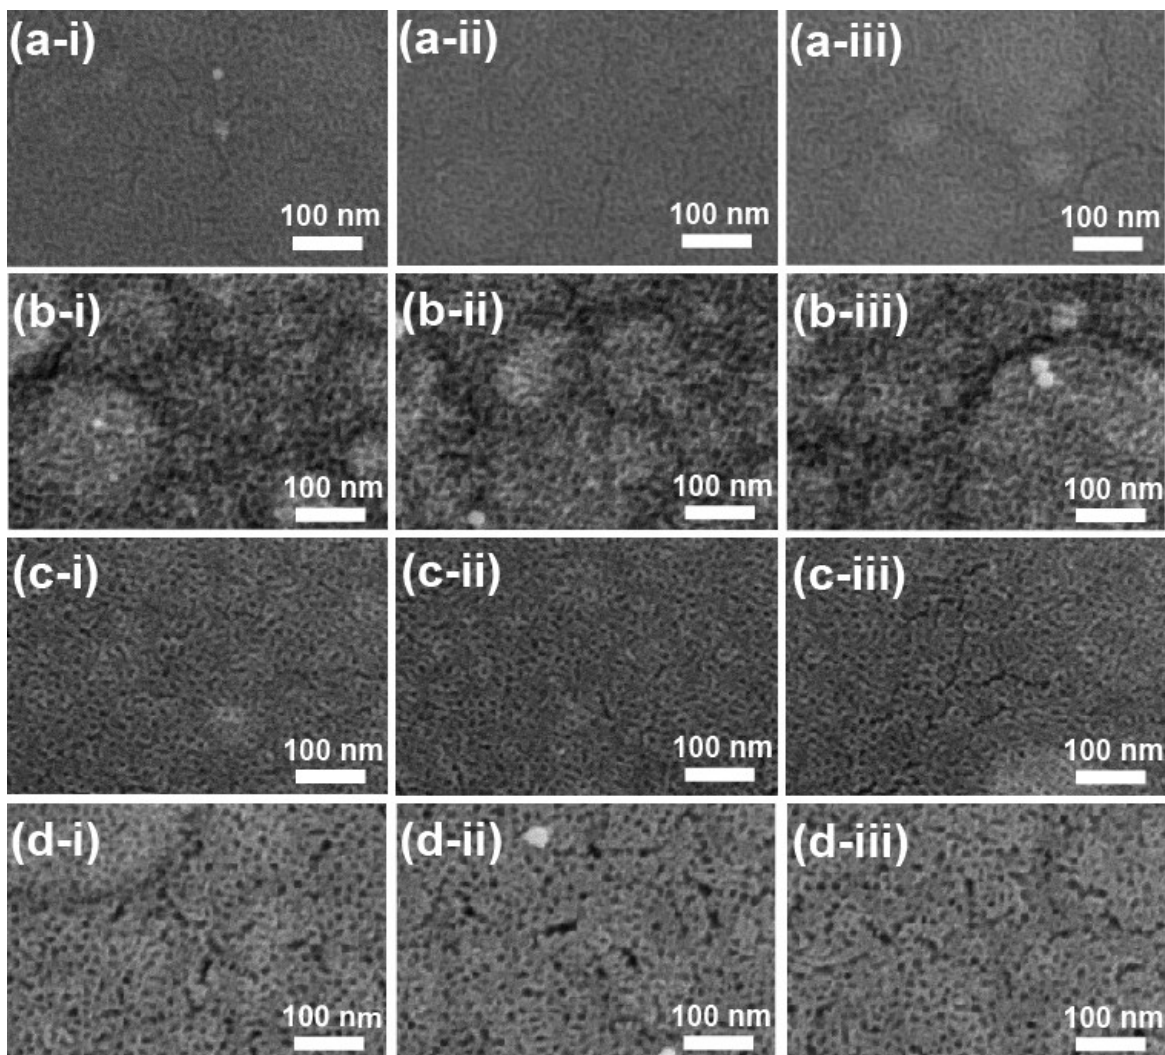

**Figure S2.** Top-view SEM images from 3 different samples (i, ii, and iii) of selected mesoporous PtPdAu films in the initial dataset with the chemical compositions of metal precursors  $[\text{PtCl}_4]^{2-}$ :  $[\text{PdCl}_4]^{2-}$ :  $[\text{AuCl}_4]^-$  of (a) 40: 40: 20, (b) 20: 40: 40, (c) 60: 30: 10, and (d) 30: 10: 60.

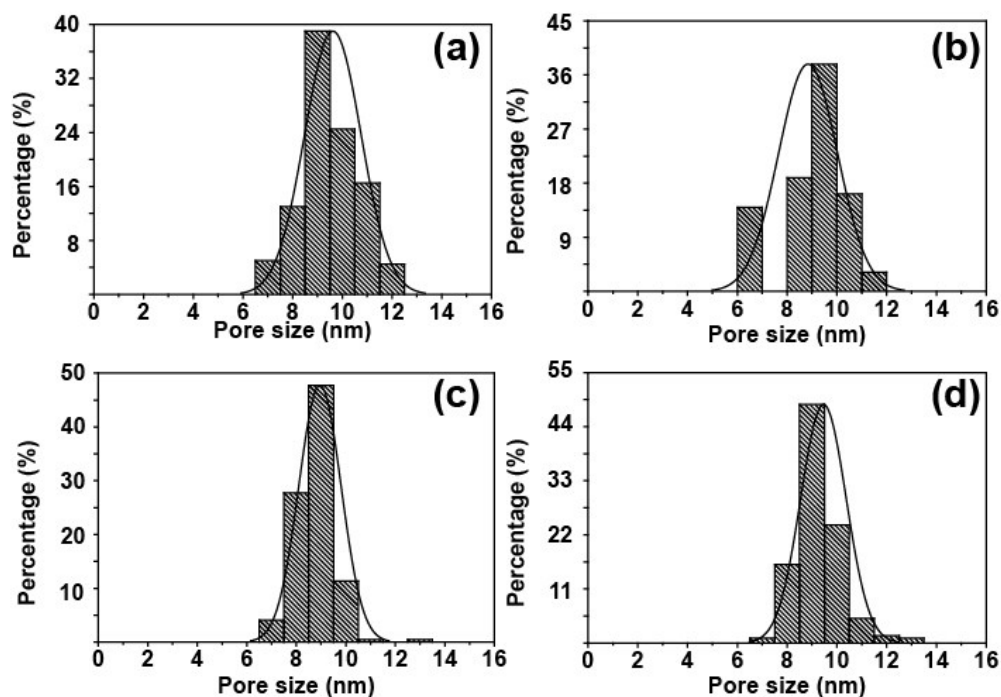

**Figure S3.** Mesopore size distribution of selected mesoporous PtPdAu films in the initial dataset with the chemical compositions of metal precursors [PtCl<sub>4</sub>]<sup>2-</sup>: [PdCl<sub>4</sub>]<sup>2-</sup>: [AuCl<sub>4</sub>]<sup>-</sup> of (a) 40: 40: 20, (b) 20: 40: 40, (c) 60: 30: 10, and (d) 30: 10: 60. Pore size distribution was taken from 3 samples for each condition with minimum 200 pores were measured.

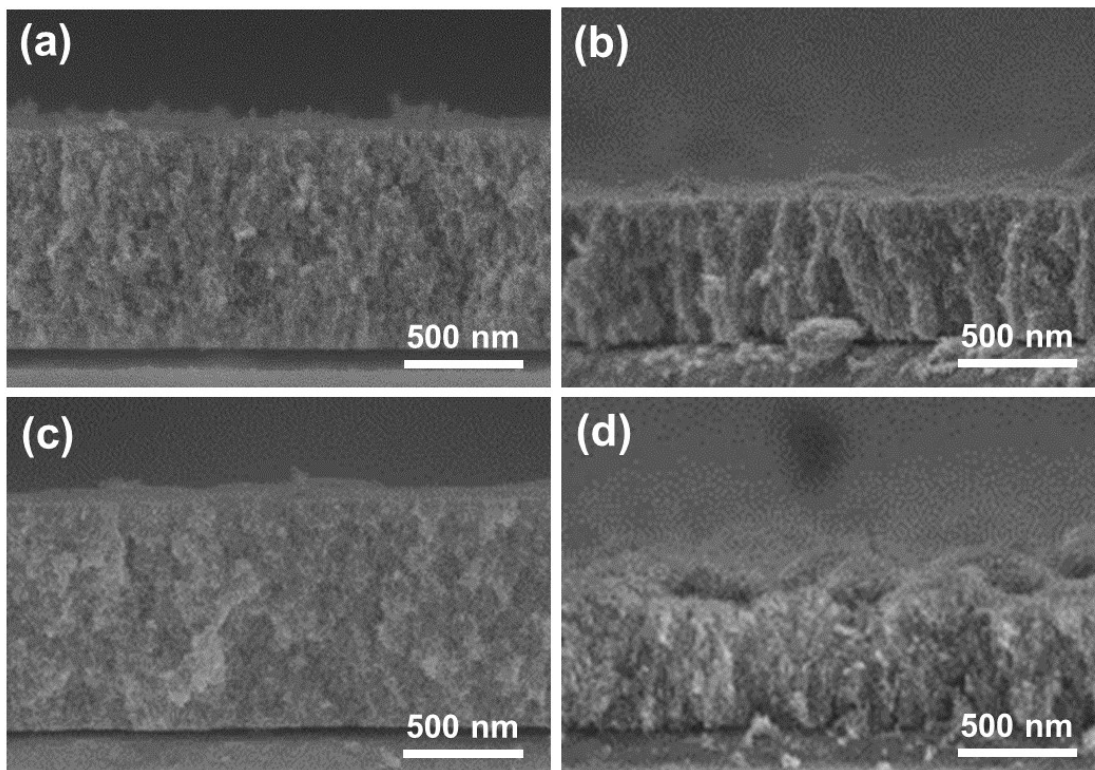

**Figure S4.** Cross-sectional view SEM images of selected mesoporous PtPdAu films in the initial dataset with the chemical compositions of metal precursors  $[\text{PtCl}_4]^{2-}$ :  $[\text{PdCl}_4]^{2-}$ :  $[\text{AuCl}_4]^-$  of (a) 40: 40: 20, (b) 20: 40: 40, (c) 60: 30: 10, and (d) 30: 10: 60.

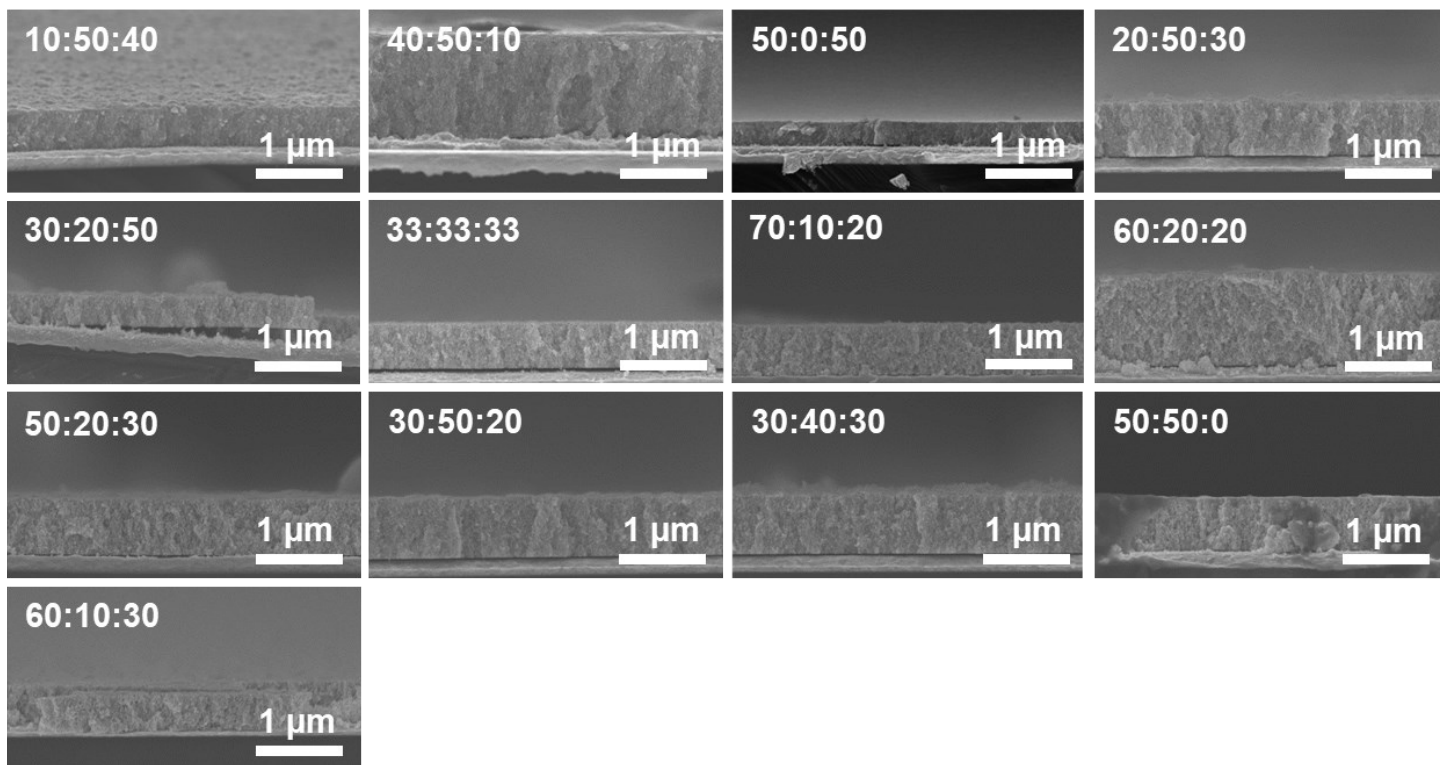

**Figure S5.** Cross-section SEM images of mesoporous PtPdAu produced by different compositional ratios of the precursor Pt:Pd:Au in the initial dataset.  $[\text{PtCl}_4]^{2-}:[\text{PdCl}_4]^{2-}:[\text{AuCl}_4]^-$  ratio in the initial electrolyte solution.

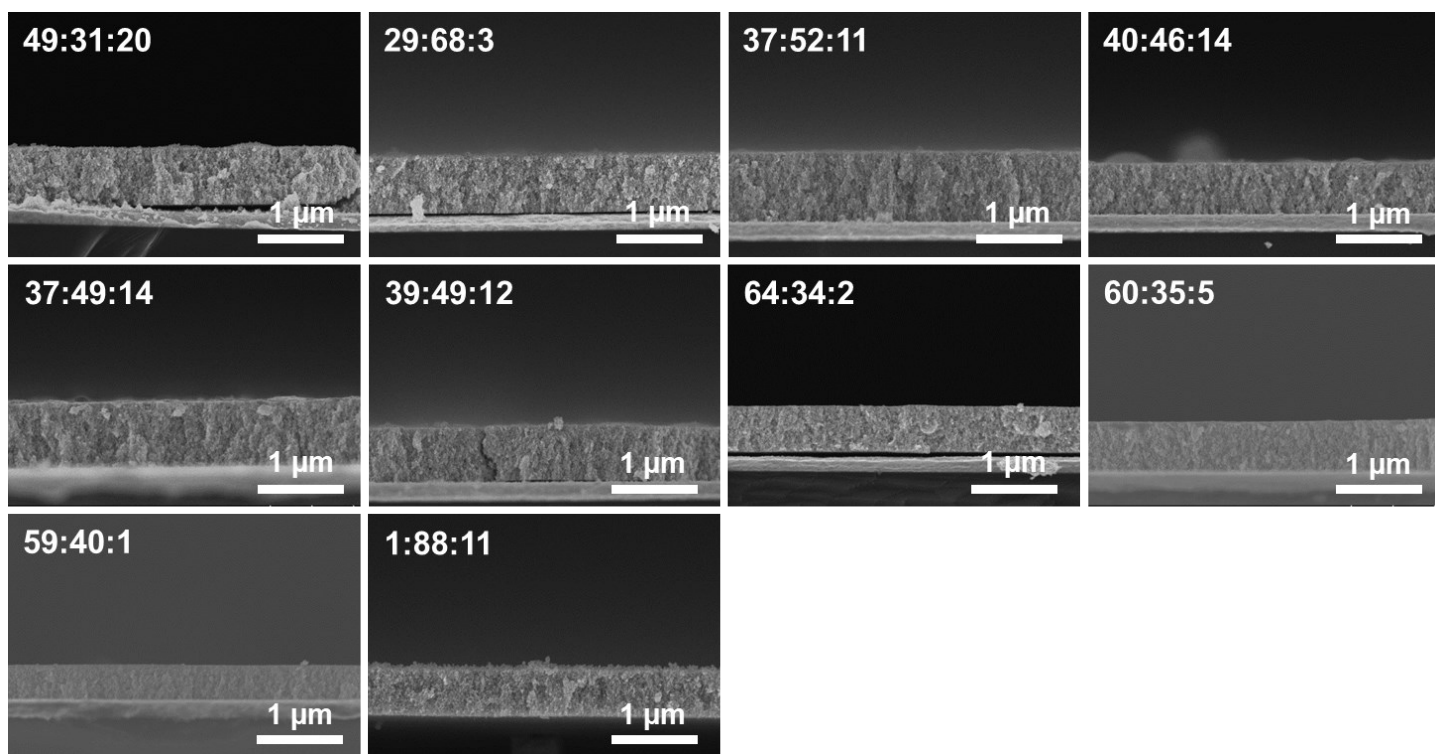

**Figure S6.** Cross-section SEM images of mesoporous PtPdAu produced by different compositional ratios of the precursor Pt:Pd:Au (dataset from 1<sup>st</sup> cycle).  $[\text{PtCl}_4]^{2-}:[\text{PdCl}_4]^{2-}:[\text{AuCl}_4]^-$  ratio in the initial electrolyte solution.

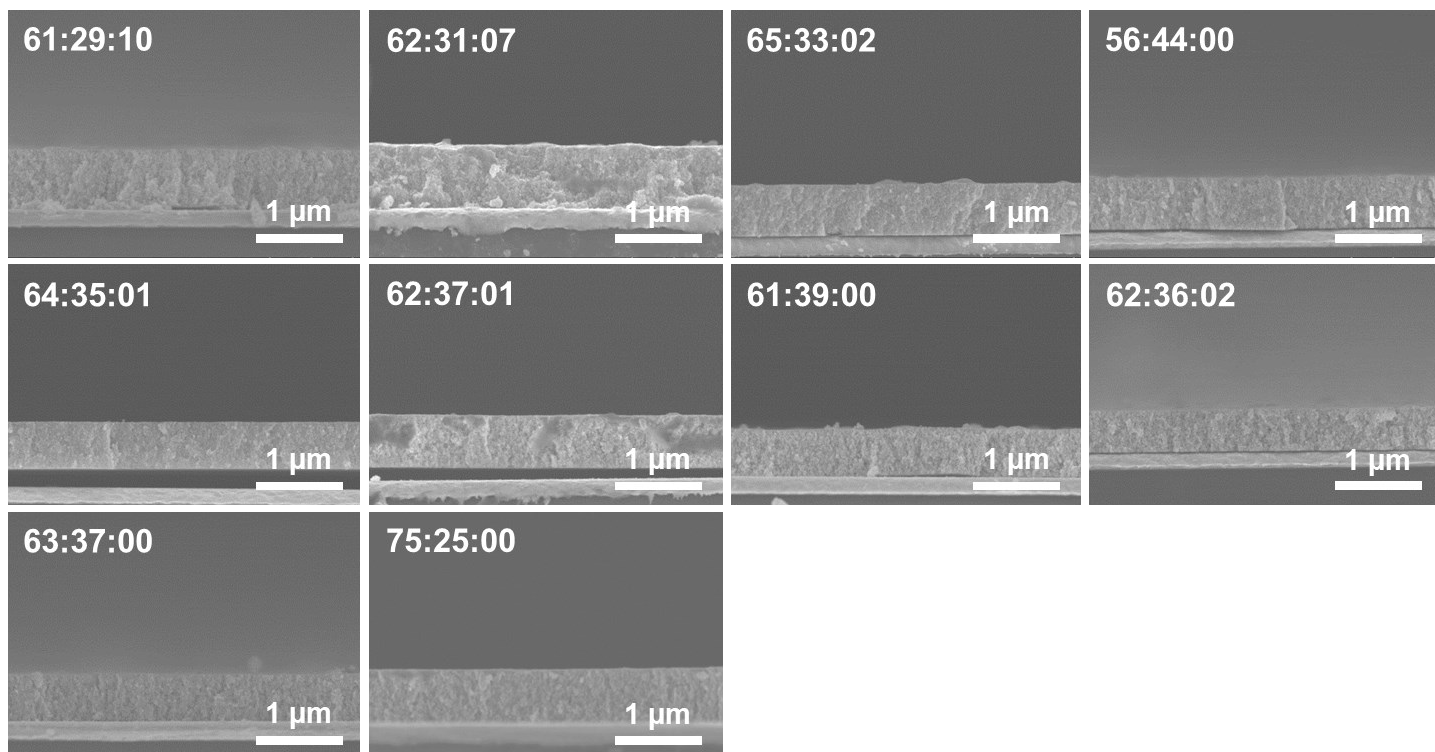

**Figure S7.** Cross-section SEM images of mesoporous PtPdAu produced by different compositional ratios of the precursor Pt:Pd:Au (dataset from 2<sup>nd</sup> cycle).  $[\text{PtCl}_4]^{2-}:[\text{PdCl}_4]^{2-}:[\text{AuCl}_4]^-$  ratio in the initial electrolyte solution.

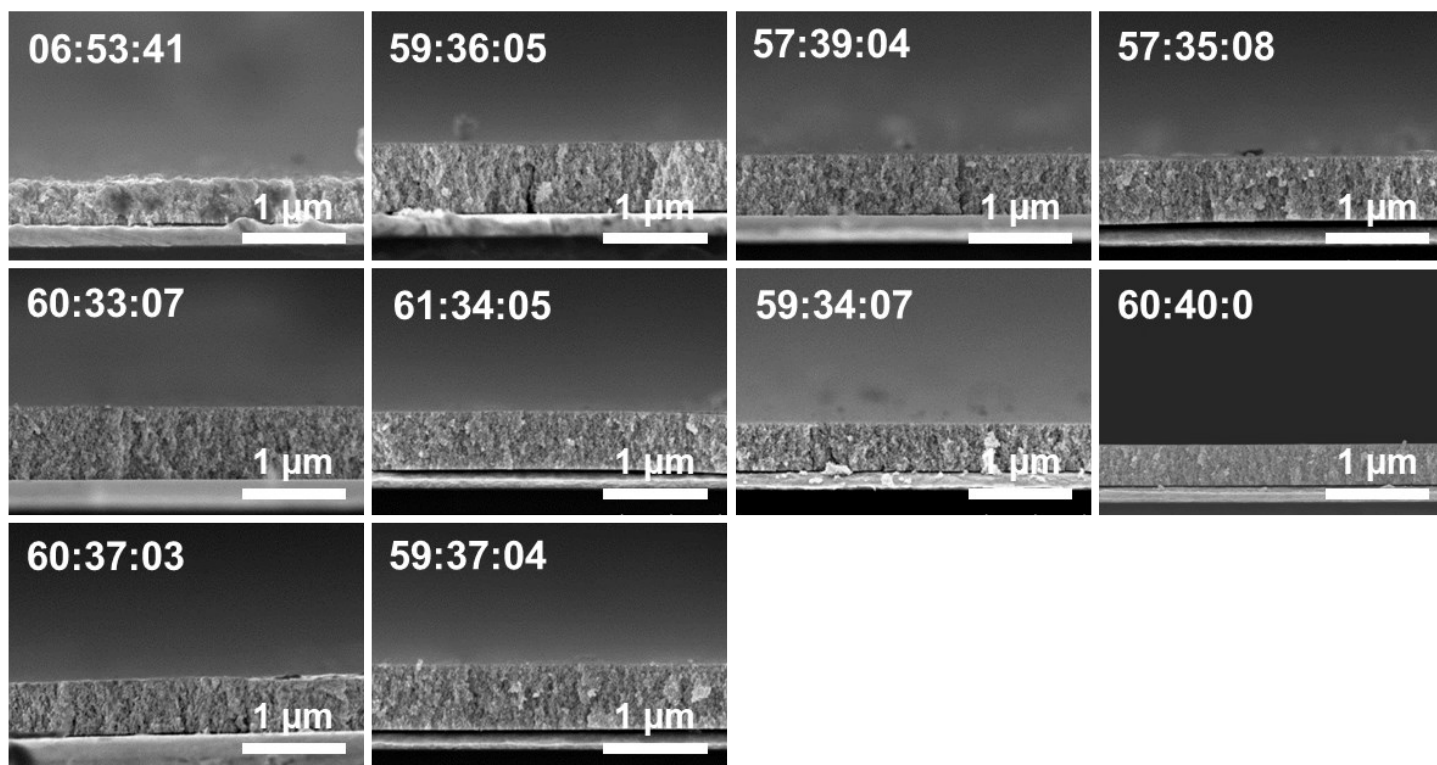

**Figure S8.** Cross-section SEM images of mesoporous PtPdAu produced by different compositional ratios of the precursor Pt:Pd:Au (dataset from 3<sup>rd</sup> cycle).  $[\text{PtCl}_4]^{2-}:[\text{PdCl}_4]^{2-}:[\text{AuCl}_4]^-$  ratio in the initial electrolyte solution.



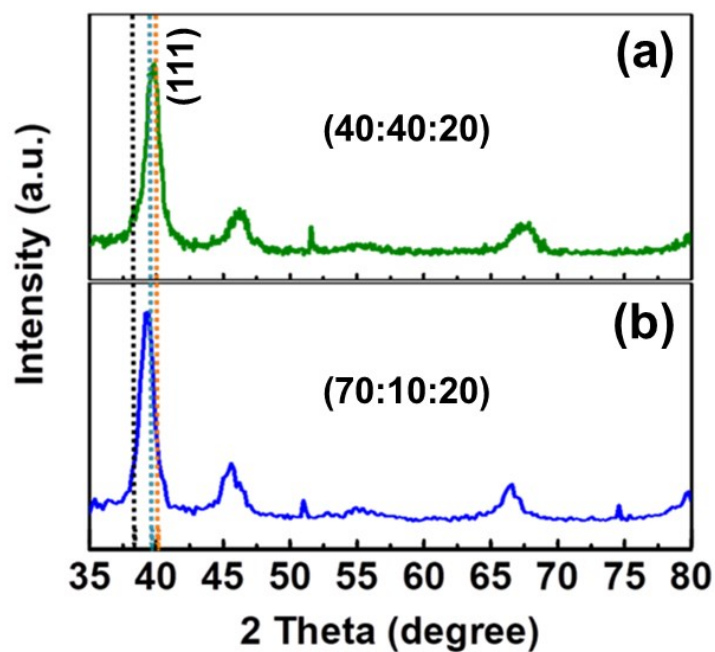

**Figure S9.** Wide-angle XRD patterns of selected mesoporous PtPdAu films in the initial dataset with the chemical compositions of metal precursors  $[\text{PtCl}_4]^{2-}$ :  $[\text{PdCl}_4]^{2-}$ :  $[\text{AuCl}_4]^-$  of (a) 40:40:20 and (b) 70:10:20. Dot lines represent: *fcc* Pt (JCPDS 05-0682), light blue; *fcc* Pd (JCPDS 04-0802), orange; *fcc* Au (JCPDS 04-0784), black.

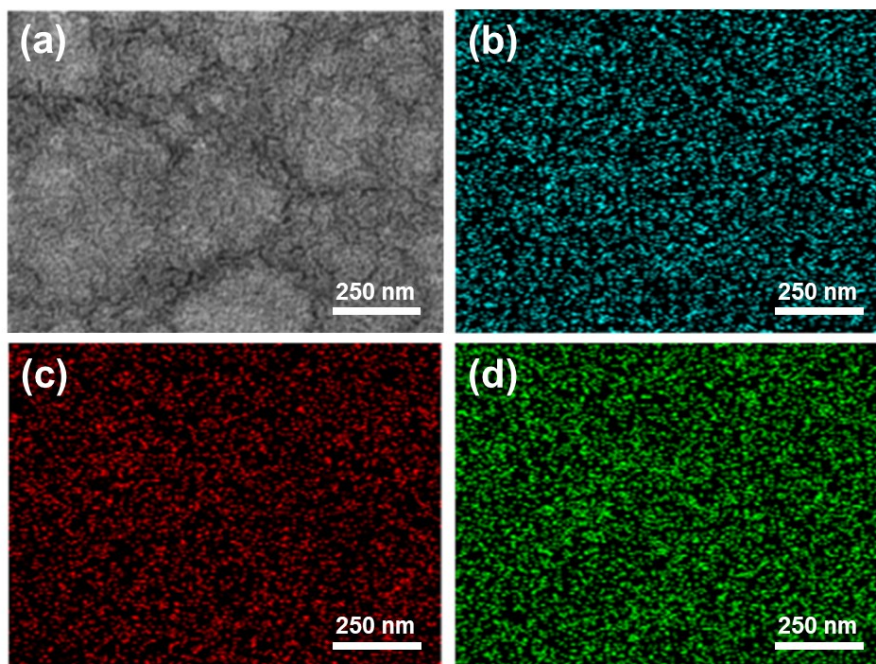

**Figure S10.** (a) Top-view SEM image and the corresponding EDX elemental mapping (b) Au, (c) Pd, and (d) Pt of mesoporous PtPdAu film fabricated from the electrolyte solution with chemical composition of  $[\text{PtCl}_4]^{2-}$ :  $[\text{PdCl}_4]^{2-}$ :  $[\text{AuCl}_4]^-$  of 33: 33: 33.

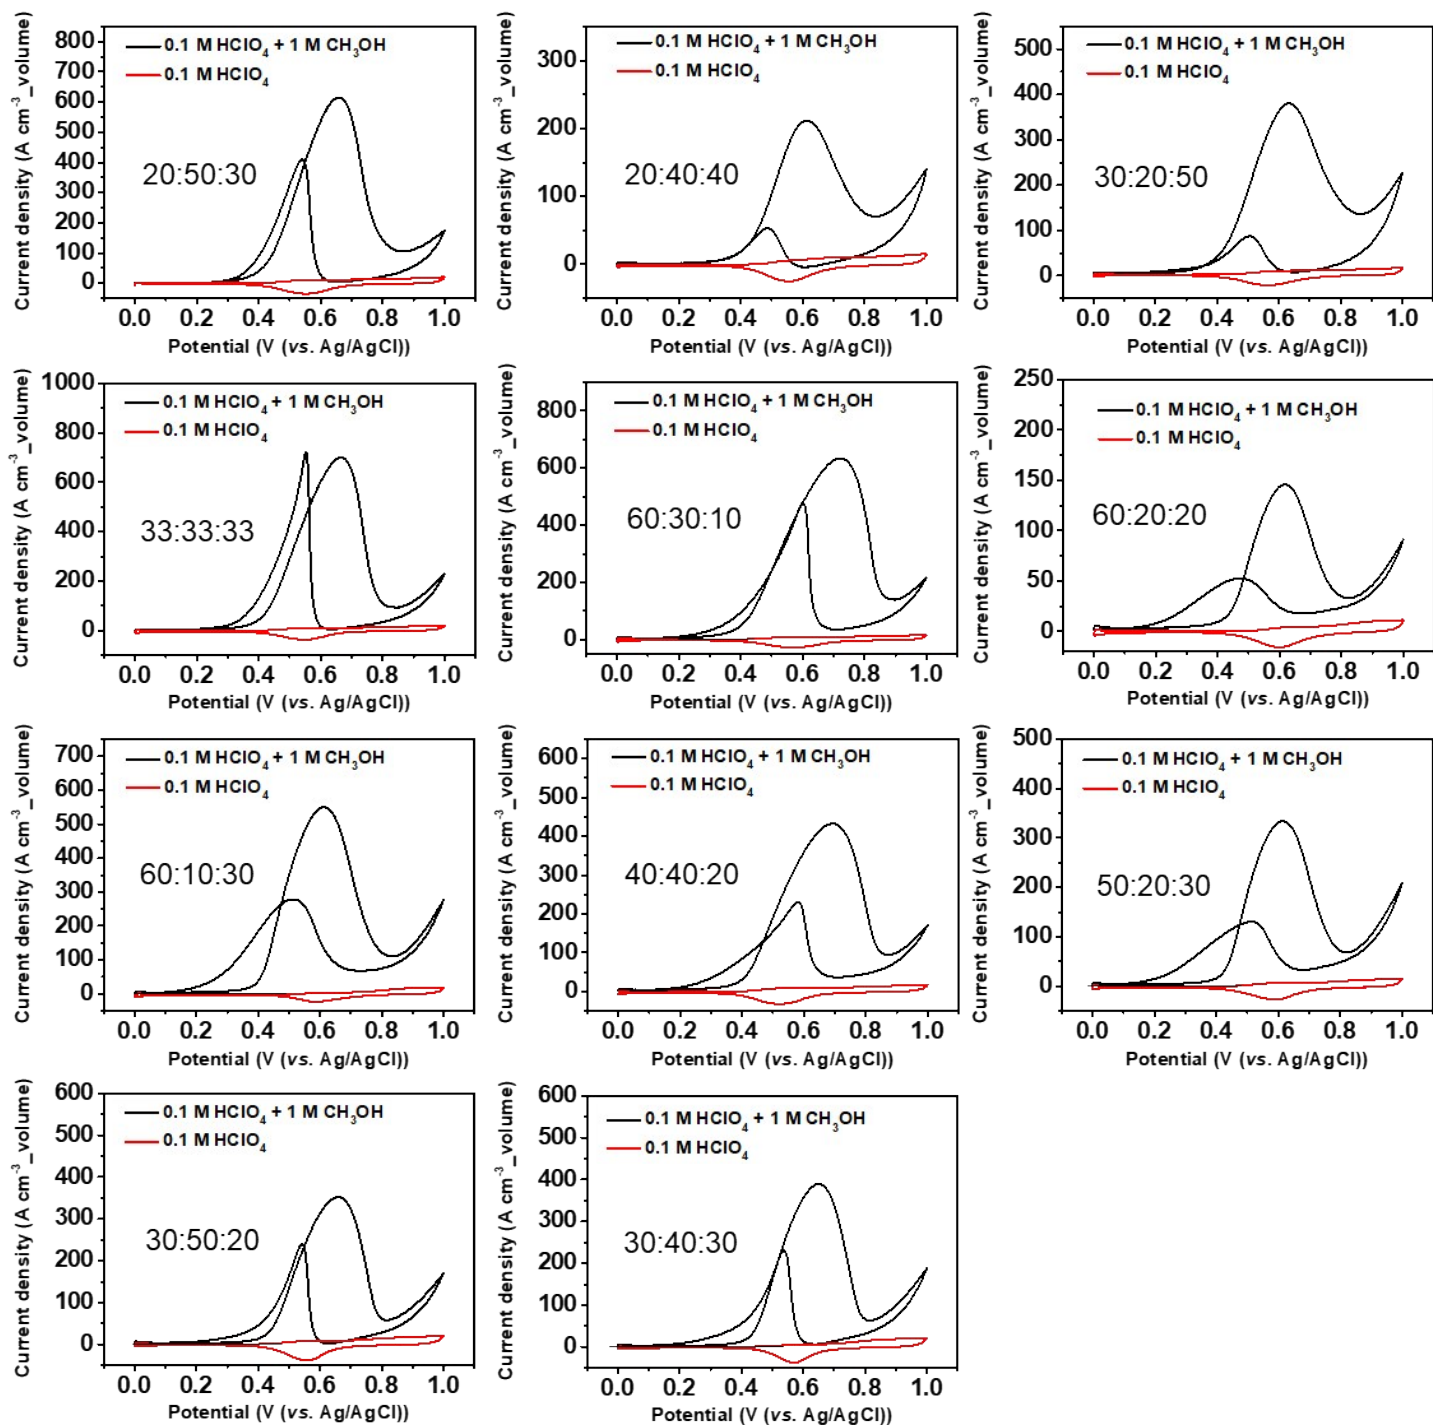

**Figure S11.** Cyclic voltammograms of methanol electrooxidation in 0.1 M HClO<sub>4</sub> + 1 M CH<sub>3</sub>OH at the scan rate of 5 mV s<sup>-1</sup> using mesoporous PtPdAu films in the initial dataset. The current density is normalized by the film volume.

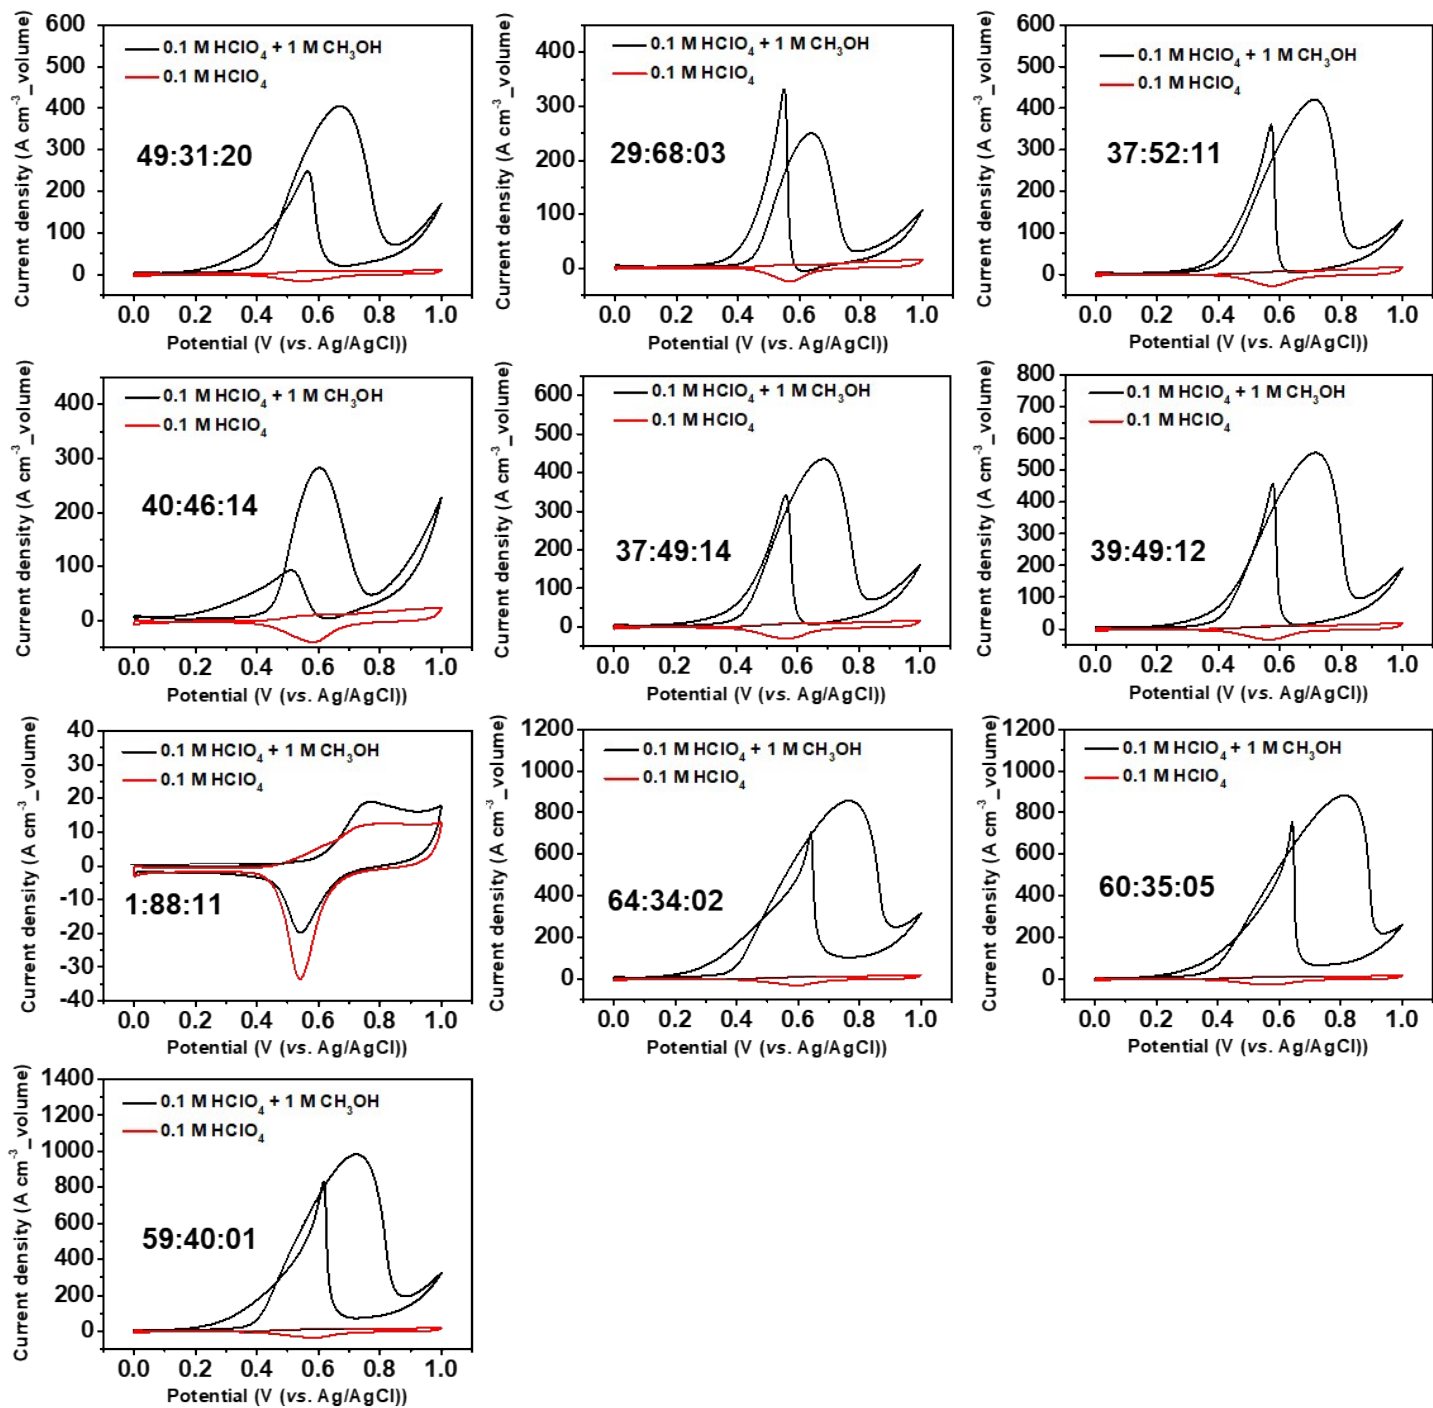

**Figure S12.** Electrocatalytic performance of mesoporous PtPdPAu with different compositions (dataset from 1<sup>st</sup> cycle) on MOR in 0.1 M HClO<sub>4</sub> + 1 M methanol at scan rate of 5 mV s<sup>-1</sup>. [PtCl<sub>4</sub>]<sup>2-</sup>: [PdCl<sub>4</sub>]<sup>2-</sup>: [AuCl<sub>4</sub>]<sup>-</sup> ratio in the initial electrolyte solution.

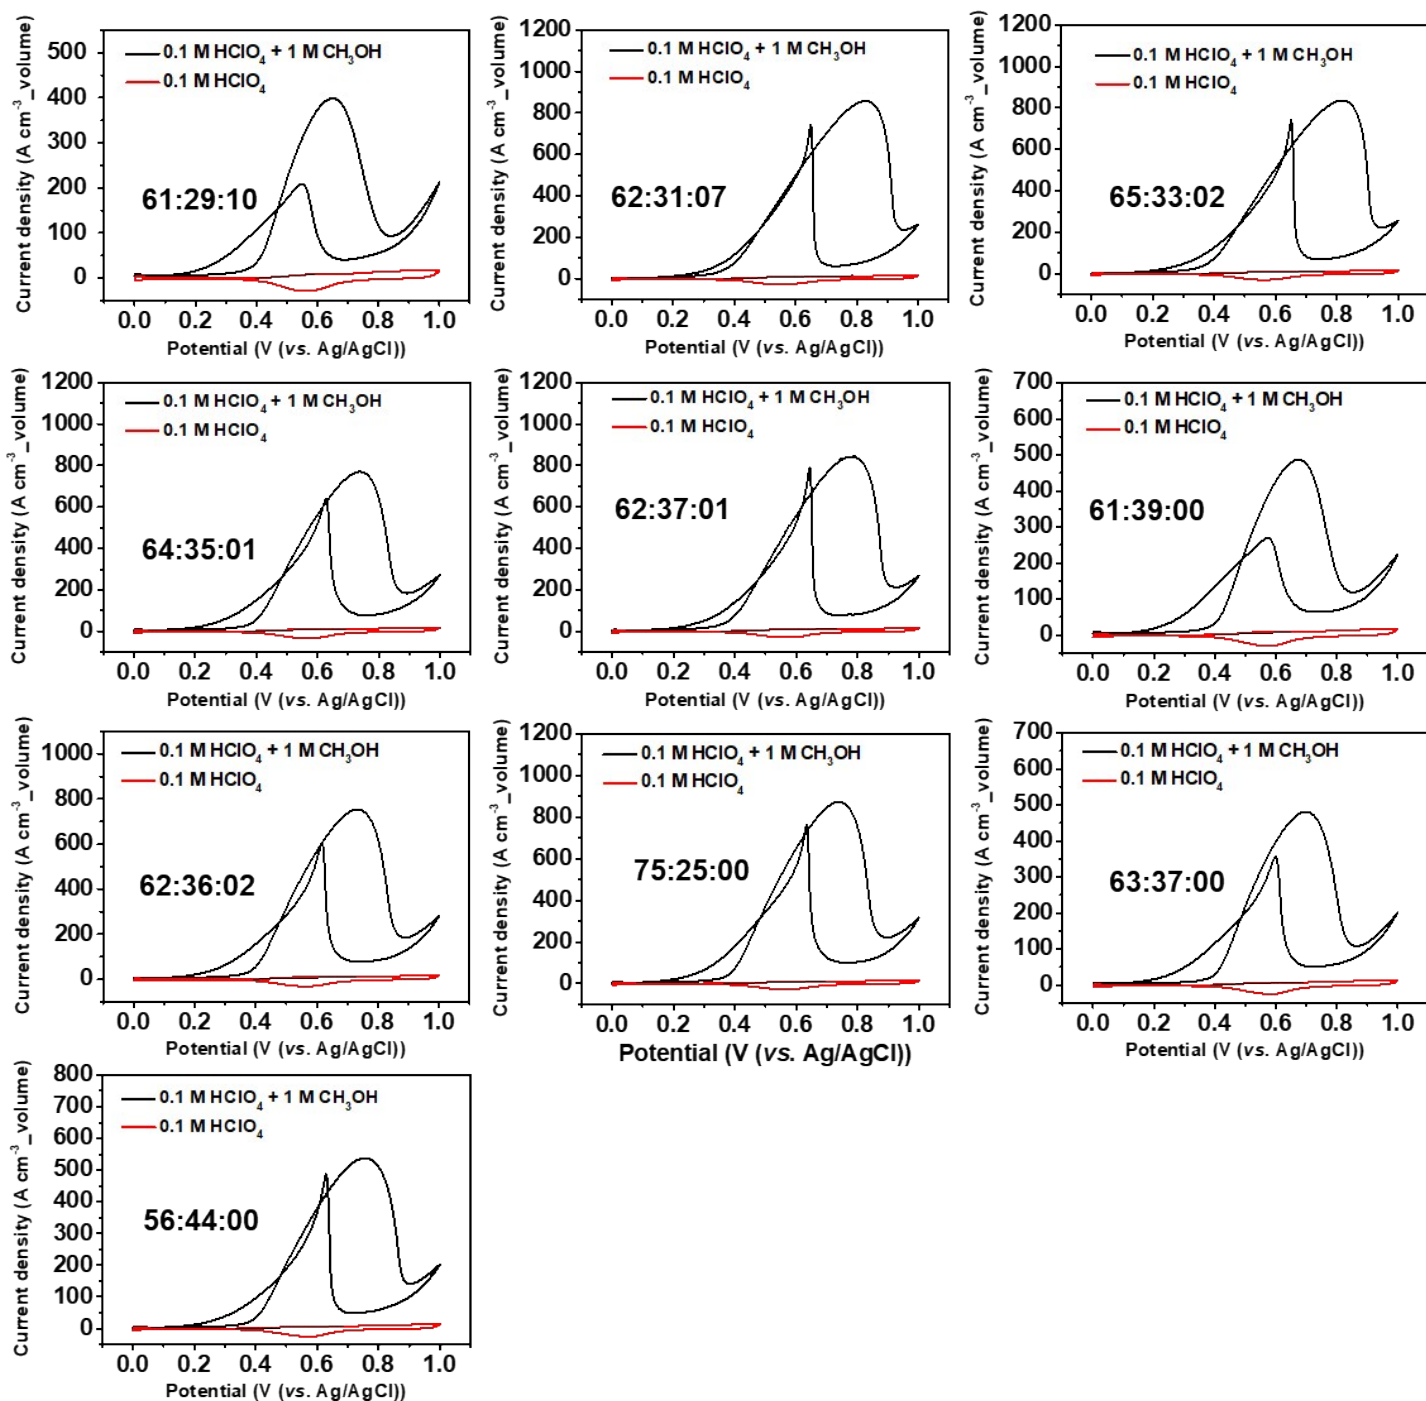

**Figure S13.** Electrochemical performance of mesoporous PtPdPAu with different compositions (dataset from 2<sup>nd</sup> cycle) on MOR in 0.1 M HClO<sub>4</sub> + 1 M methanol at scan rate of 5 mV s<sup>-1</sup>. [PtCl<sub>4</sub>]<sup>2-</sup>: [PdCl<sub>4</sub>]<sup>2-</sup>: [AuCl<sub>4</sub>]<sup>-</sup> ratio in the initial electrolyte solution.



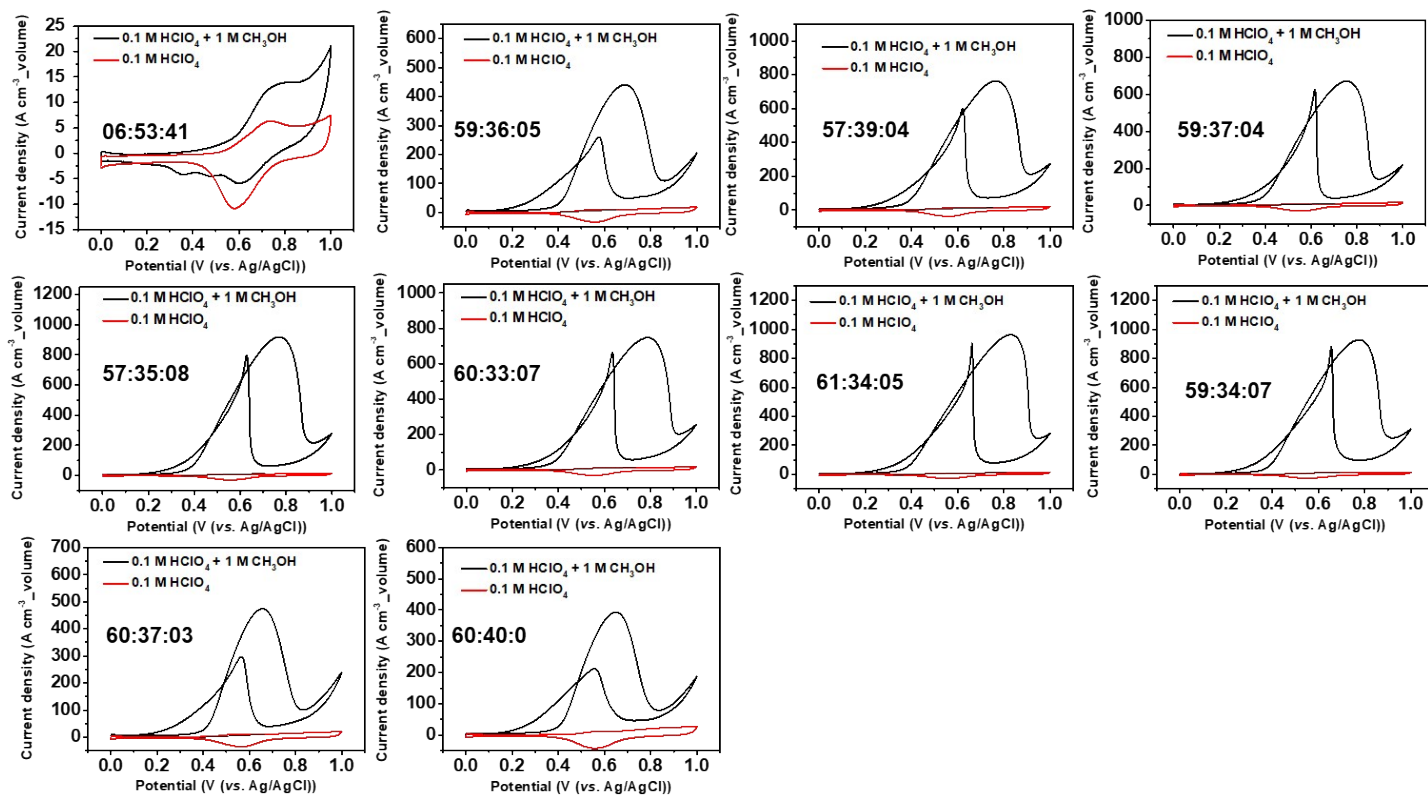

**Figure S14.** Electrochemical performance of mesoporous PtPdPAu with different compositions (dataset from 3<sup>rd</sup> cycle) on MOR in 0.1 M HClO<sub>4</sub> + 1 M methanol at scan rate of 5 mV s<sup>-1</sup>. [PtCl<sub>4</sub>]<sup>2-</sup>: [PdCl<sub>4</sub>]<sup>2-</sup>: [AuCl<sub>4</sub>]<sup>-</sup> ratio in the initial electrolyte solution.

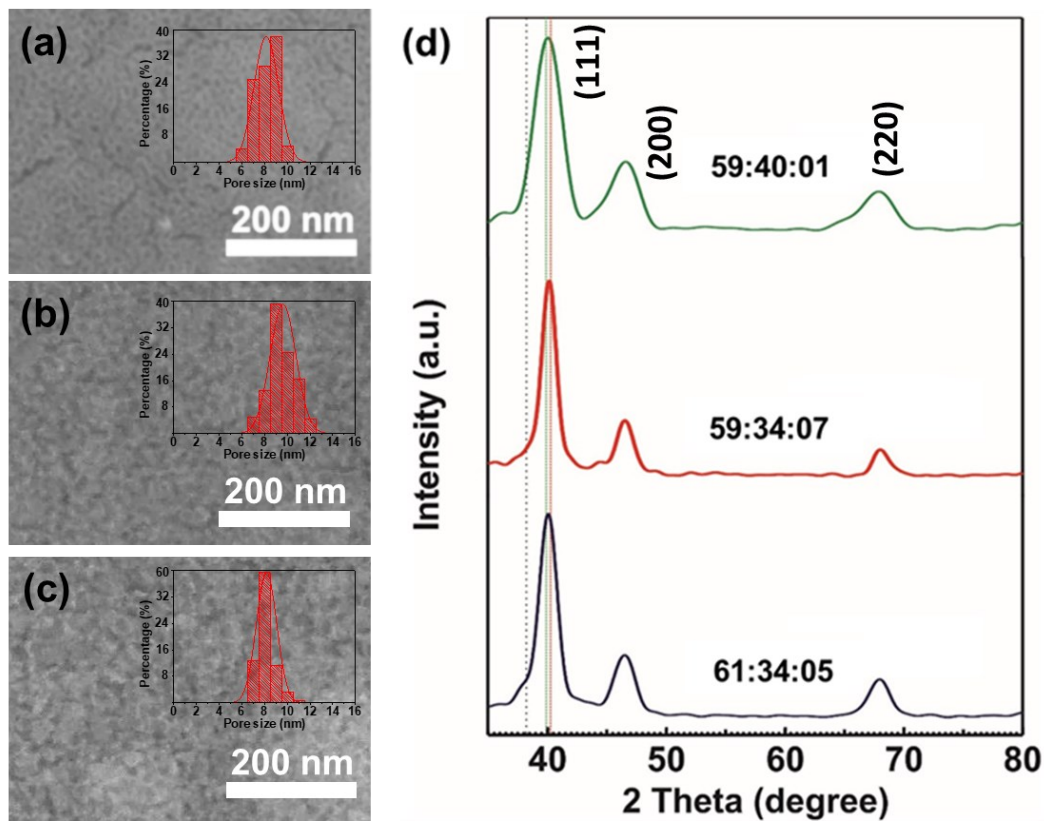

**Figure S15.** Top-view SEM images of mesoporous PtPdAu films fabricated from electrolyte solutions with  $[\text{PtCl}_4]^{2-}$ :  $[\text{PdCl}_4]^{2-}$ :  $[\text{AuCl}_4]^-$  of (a) 59: 40: 1, (b) 59: 34: 7, and (c) 61: 34: 5. (d) Wide-angle XRD patterns of mesoporous PtPdAu films. Dot lines represent: *fcc* Pt (JCPDS 05-0682), light blue; *fcc* Pd (JCPDS 04-0802), orange; *fcc* Au (JCPDS 04-0784), black.

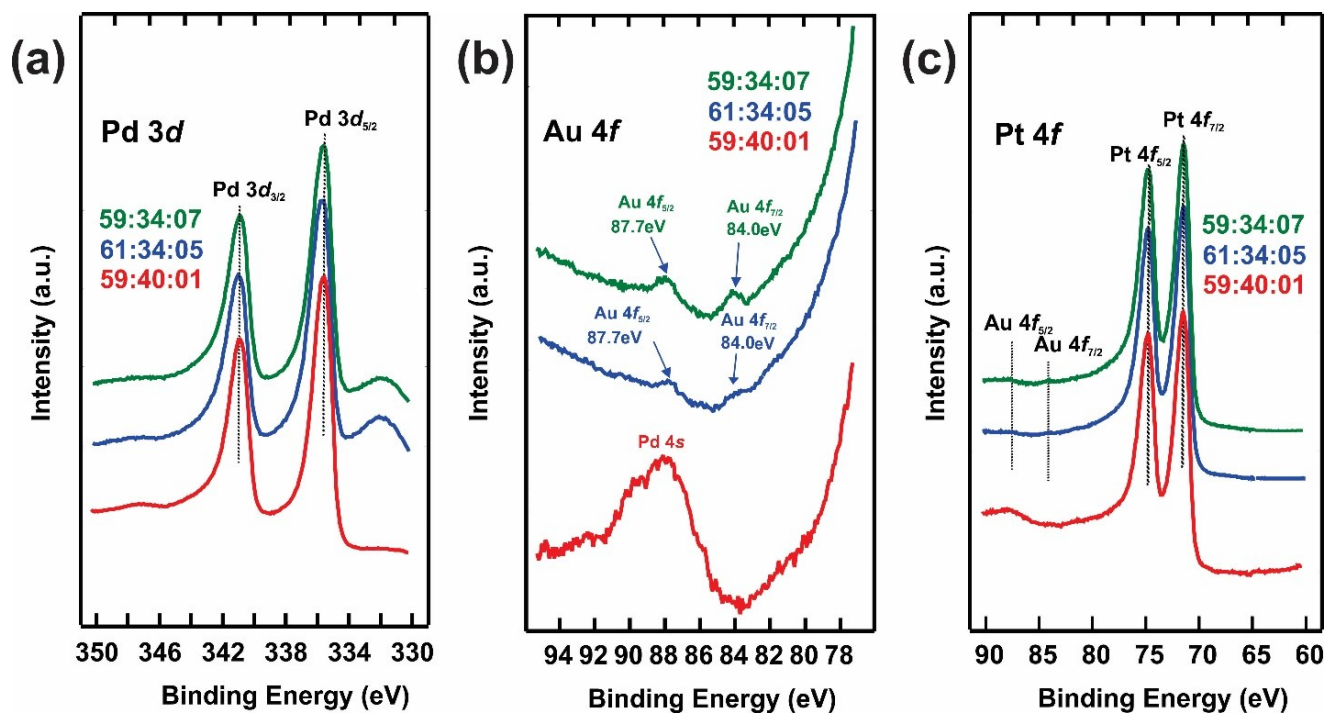

**Figure S16.** XPS spectra of mesoporous PtPdAu films fabricated from electrolyte solutions with  $[\text{PtCl}_4]^{2-}$ :  $[\text{PdCl}_4]^{2-}$ :  $[\text{AuCl}_4]^-$  of 59: 40: 1 (red line), 61: 34: 5 (blue line) and 59: 34: 7 (green line) on (a) Pd 3d, (b) Au 4f, and (c) Pt 4f.



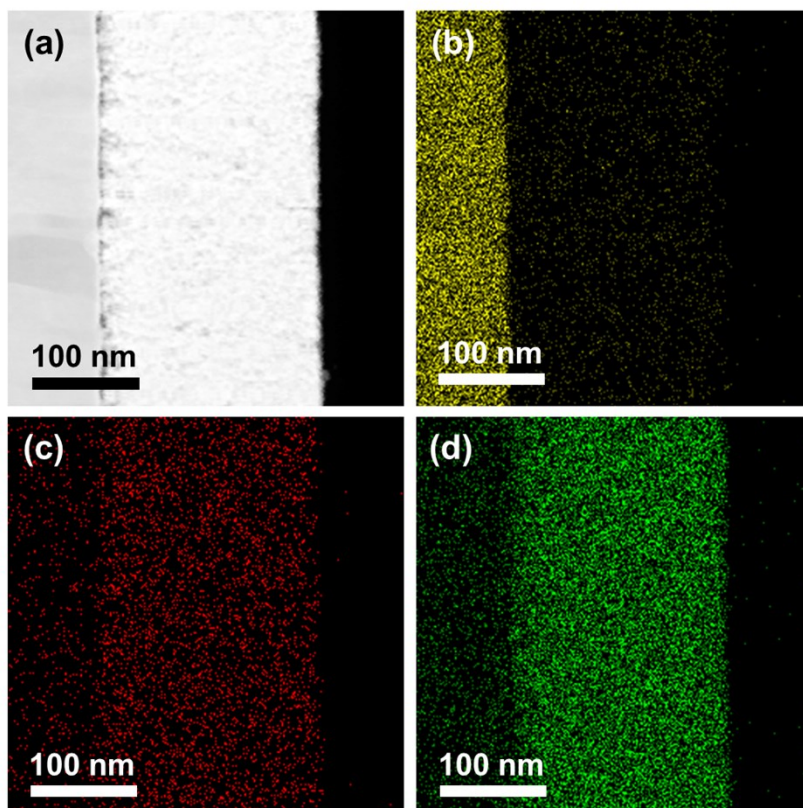

**Figure S17.** (a) HAADF-STEM image and the corresponding EDX elemental mapping of (b) Au, (c) Pd, and (d) Pt of mesoporous PtPdAu film fabricated from the electrolyte solution with  $[\text{PtCl}_4]^{2-}$ :  $[\text{PdCl}_4]^{2-}$ :  $[\text{AuCl}_4]^-$  of 59: 40: 1.

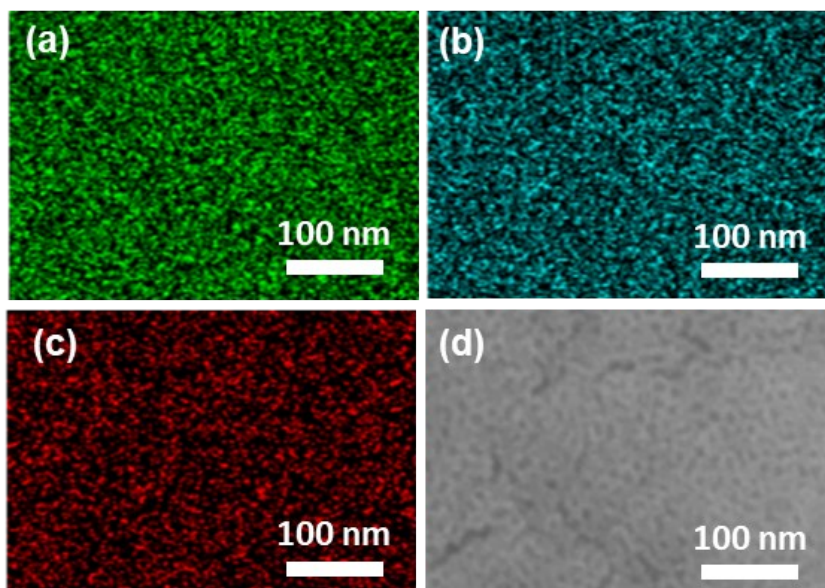

**Figure S18.** EDX elemental mapping of (a) Pt, (b) Pd, (c) Au, and (d) Top-surface of mesoporous PtPdAu film fabricated from the electrolyte solution with  $[\text{PtCl}_4]^{2-}$ :  $[\text{PdCl}_4]^{2-}$ :  $[\text{AuCl}_4]^-$  of 59: 40: 1.

**Table S1.** Compositional ratios of metal precursors in the electrolyte solutions, and thickness and electrocatalytic results on methanol oxidation of the resulting films.<sup>[a]</sup>

| Run                                             | Compositions of metal precursors (Pt: Pd: Au) <sup>[b]</sup> | Film thickness [nm] | Onset potential <sup>[c]</sup> [V] | Peak potential <sup>[c]</sup> [V] | Peak current volume density [A cm <sup>-3</sup> ] |
|-------------------------------------------------|--------------------------------------------------------------|---------------------|------------------------------------|-----------------------------------|---------------------------------------------------|
| <b><i>Initial dataset</i></b>                   |                                                              |                     |                                    |                                   |                                                   |
| 1                                               | 10: 50: 40                                                   | 467                 | 0.42                               | 0.64                              | 35.76                                             |
| 2                                               | 30: 10: 60                                                   | 407                 | 0.41                               | 0.61                              | 227.03                                            |
| 3                                               | 20: 50: 30                                                   | 632                 | 0.42                               | 0.65                              | 618.67                                            |
| 4                                               | 20: 40: 40                                                   | 636                 | 0.43                               | 0.61                              | 212.26                                            |
| 5                                               | 30: 20: 50                                                   | 364                 | 0.42                               | 0.63                              | 381.87                                            |
| 6                                               | 33: 33: 33                                                   | 559                 | 0.42                               | 0.66                              | 701.79                                            |
| 7                                               | 50: 0: 50                                                    | 333                 | 0.44                               | 0.55                              | 79.58                                             |
| 8                                               | 70: 10: 20                                                   | 602                 | 0.41                               | 0.61                              | 468.44                                            |
| 9                                               | 60: 30: 10                                                   | 975                 | 0.41                               | 0.72                              | 633.85                                            |
| 10                                              | 60: 20: 20                                                   | 1110                | 0.43                               | 0.62                              | 145.95                                            |
| 11                                              | 60: 10: 30                                                   | 449                 | 0.40                               | 0.61                              | 550.11                                            |
| 12                                              | 40: 40: 20                                                   | 923                 | 0.40                               | 0.70                              | 433.37                                            |
| 13                                              | 40: 50: 10                                                   | 1267                | 0.39                               | 0.72                              | 511.44                                            |
| 14                                              | 50: 20: 30                                                   | 703                 | 0.42                               | 0.61                              | 334.28                                            |
| 15                                              | 30: 50: 20                                                   | 720                 | 0.43                               | 0.66                              | 352.78                                            |
| 16                                              | 30: 40: 30                                                   | 703                 | 0.43                               | 0.65                              | 389.76                                            |
| 17                                              | 50: 50: 0                                                    | 661                 | 0.44                               | 0.62                              | 338.88                                            |
| <b><i>Dataset from 1<sup>st</sup> cycle</i></b> |                                                              |                     |                                    |                                   |                                                   |
| 18                                              | 49: 31: 20                                                   | 728                 | 0.41                               | 0.67                              | 405.32                                            |
| 19                                              | 29: 68: 3                                                    | 677                 | 0.45                               | 0.64                              | 250.01                                            |
| 20                                              | 37: 52: 11                                                   | 838                 | 0.42                               | 0.71                              | 420.31                                            |
| 21                                              | 40: 46: 14                                                   | 635                 | 0.46                               | 0.60                              | 284.05                                            |
| 22                                              | 37: 49: 14                                                   | 847                 | 0.42                               | 0.68                              | 437.89                                            |
| 23                                              | 39: 49: 12                                                   | 677                 | 0.41                               | 0.71                              | 556.92                                            |
| 24                                              | 1: 88: 11                                                    | 610                 | n.a. <sup>[d]</sup>                | n.a. <sup>[d]</sup>               | n.a. <sup>[d]</sup>                               |
| 25                                              | 64: 34: 2                                                    | 567                 | 0.39                               | 0.76                              | 858.32                                            |

|                                          |            |     |                     |                     |                     |
|------------------------------------------|------------|-----|---------------------|---------------------|---------------------|
| 26                                       | 60: 35: 5  | 670 | 0.38                | 0.81                | 885.85              |
| 27                                       | 59: 40: 1  | 457 | 0.39                | 0.72                | 983.47              |
| <b>Dataset from 2<sup>nd</sup> cycle</b> |            |     |                     |                     |                     |
| 28                                       | 61: 29: 10 | 711 | 0.40                | 0.65                | 399.02              |
| 29                                       | 62: 31: 7  | 720 | 0.36                | 0.83                | 863.68              |
| 30                                       | 65: 33: 2  | 618 | 0.37                | 0.82                | 842.02              |
| 31                                       | 64: 35: 1  | 576 | 0.38                | 0.74                | 769.66              |
| 32                                       | 62: 37: 1  | 635 | 0.375               | 0.79                | 843.83              |
| 33                                       | 61: 39: 0  | 533 | 0.40                | 0.67                | 488.50              |
| 34                                       | 62: 36: 2  | 508 | 0.39                | 0.73                | 757.66              |
| 35                                       | 75: 25: 0  | 449 | 0.39                | 0.74                | 879.32              |
| 36                                       | 63: 37: 0  | 584 | 0.39                | 0.69                | 481.99              |
| 37                                       | 56: 44: 0  | 627 | 0.38                | 0.76                | 540.94              |
| <b>Dataset from 3<sup>rd</sup> cycle</b> |            |     |                     |                     |                     |
| 38                                       | 6: 53: 41  | 452 | n.a. <sup>[d]</sup> | n.a. <sup>[d]</sup> | n.a. <sup>[d]</sup> |
| 39                                       | 59: 36: 5  | 676 | 0.40                | 0.69                | 441.05              |
| 40                                       | 57: 39: 4  | 611 | 0.38                | 0.69                | 767.41              |
| 41                                       | 59: 37: 4  | 660 | 0.38                | 0.76                | 671.42              |
| 42                                       | 57: 35: 8  | 647 | 0.38                | 0.75                | 921.06              |
| 43                                       | 60: 33: 7  | 726 | 0.37                | 0.77                | 751.96              |
| 44                                       | 61: 34: 5  | 597 | 0.38                | 0.79                | 968.73              |
| 45                                       | 59: 34: 7  | 503 | 0.38                | 0.83                | 929.33              |
| 46                                       | 60: 37: 3  | 561 | 0.41                | 0.65                | 475.34              |
| 47                                       | 60: 40: 0  | 483 | 0.41                | 0.65                | 392.61              |

<sup>[a]</sup>Electrochemical oxidation of methanol was measured in 0.1 M HClO<sub>4</sub> containing 1.0 M CH<sub>3</sub>OH.

<sup>[b]</sup>Molar ratios of [PtCl<sub>4</sub>]<sup>2-</sup>: [PdCl<sub>4</sub>]<sup>2-</sup>: [AuCl<sub>4</sub>]<sup>-</sup> in the electrolyte solutions.

<sup>[c]</sup>Reported with Ag/AgCl reference.

<sup>[d]</sup>Oxidation peak was too small to accurately determine the values (i.e., almost no activity).
